# Supplementary material for: Subdiffraction nanofocusing of circularly polarized light with a plasmonic cavity lens
Source: Royal Society of Chemistry journal article supplement (doi:10.1039/c9tc00499h), 2019-01-01
Supplement: c9tc00499h1.pdf [file c9tc00499h1.pdf]

## Supplementary Information

### Subdiffraction Nanofocusing of Circularly Polarized Light with Plasmonic Cavity Lens

Yunfei Luo,<sup>‡a,b</sup> Weijie Kong,<sup>‡a,b</sup> Chengwei Zhao,<sup>‡a,b</sup> Kaipeng Liu,<sup>a</sup> Mingbo Pu,<sup>a,b</sup> Changtao Wang<sup>a,b</sup> and Xiangang Luo<sup>\*a,b</sup>

<sup>a</sup>State Key Laboratory of Optical Technologies on Nano-Fabrication and Micro-Engineering, Institute of Optics and Electronics, Chinese Academy of Science, P.O. Box 350, Chengdu 610209, China.

<sup>b</sup>University of Chinese Academy of Sciences, Beijing 100049, China.

\* Email address: [lxg@ioe.ac.cn](mailto:lxg@ioe.ac.cn)

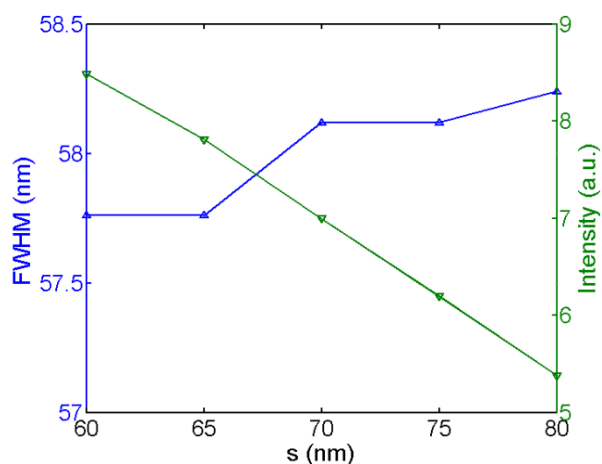

Fig. S1 Size (FWHM) and intensity of the focal spot under the different slot width  $s$ .

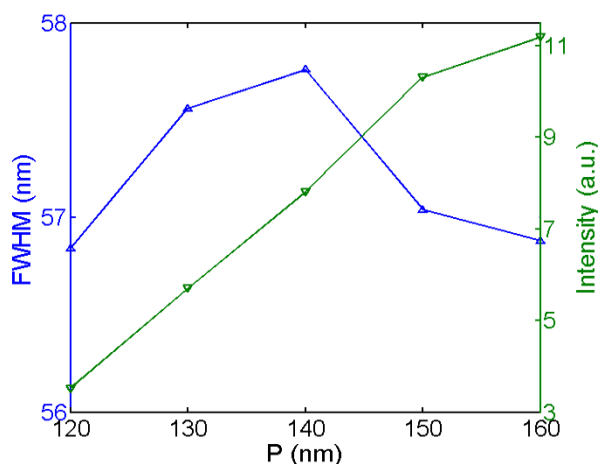

Fig. S2 Size (FWHM) and intensity of the focal spot under the different screw pitch  $P$ .

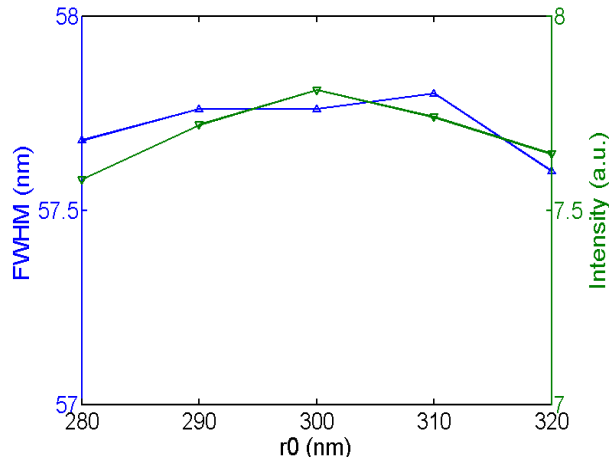

Fig. S3 Size (FWHM) and intensity of the focal spot under the different initial distance  $r_0$ .

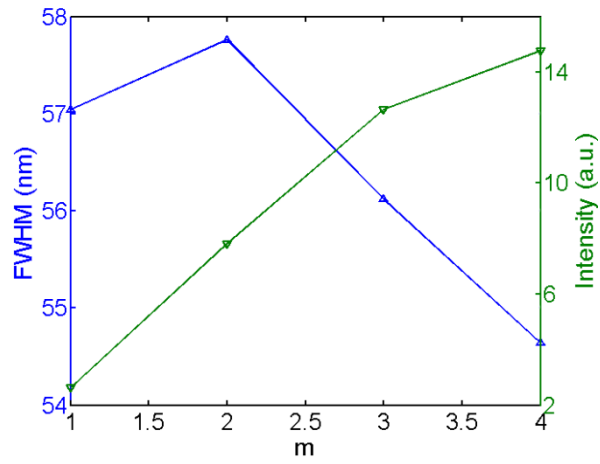

Fig. S4 Size (FWHM) and intensity of the focal spot under the different number of turns  $m$ .
